# Supplementary material
Source: MDPI journal article supplement (https://www.mdpi.com/2410-3888/8/11/563)
Supplement: s1 [file s1]

Table S1: ANOVA results for CPUE for gillnet and longline trips.

| Source                  | GN    |                |          |         |               | LL   |                |          |         |               |
|-------------------------|-------|----------------|----------|---------|---------------|------|----------------|----------|---------|---------------|
|                         | DF    | Sum of squares | Mean sq. | F-value | P-value       | DF   | Sum of squares | Mean sq. | F-value | P-value       |
| Vessel propulsion       | 1     | 3579           | 3579.5   | 1477.07 | < 2.2e-16 *** | 1    | 2.62           | 2.6191   | 97.54   | < 2.2e-16 *** |
| Year                    | 8     | 7492           | 936.6    | 386.47  | < 2.2e-16 *** | 8    | 19.72          | 2.4644   | 91.77   | < 2.2e-16 *** |
| Vessel propulsion: Year | 8     | 2182           | 272.8    | 112.56  | < 2.2e-16 *** | 8    | 5.80           | 0.7251   | 27.00   | < 2.2e-16 *** |
| Residuals               | 16184 | 39220          | 2.4      |         |               | 4609 | 123.77         | 0.0269   |         |               |

Table S2: Trip CPUE post hoc tests multiple comparisons.

| Difference of Levels     | Gillnet trips       |                  |                  | Longline trips      |                  |                  |
|--------------------------|---------------------|------------------|------------------|---------------------|------------------|------------------|
|                          | Difference of means | 95% CI           | Adjusted P-value | Difference of means | 95% CI           | Adjusted P-value |
| Paddled-Motorised        | 0.960               | (0.914, 1.012)   | 0.000            | 0.048               | (0.0381, 0.057)  | 0.000            |
| Paddled -Motorised: 2005 | -0.184              | (-0.375, 0.007)  | 0.076            | 0.030               | (-0.010, 0.071)  | 0.432            |
| Paddled-Motorised:2015   | 1.895               | (1.587, 2.202)   | 0.000            | 0.025               | (-0.042, 0.093)  | 0.997            |
| Paddled-Motorised:2021   | 2.558               | (1.361, 3.756)   | 0.000            | 0.338               | (0.232, 0.443)   | 0.000            |
| Motorised:2015-2005      | -1.457              | (-1.686, -1.227) | 0.000            | -0.238              | (-0.295, -0.182) | 0.000            |
| Paddled: 2015-2005       | 0.622               | (0.341, 0.902)   | 0.000            | -0.243              | (-0.298, -0.189) | 0.000            |
| Motorised:2021-2015      | -1.247              | (-1.500, -0.994) | 0.000            | 0.051               | (-0.004, 0.107)  | 0.113            |
| Paddled:2021-2015        | -0.583              | (1.794, -0.627)  | 0.970            | 0.363               | (0.251, 0.476)   | 0.000            |
