# Supplementary material
Source: MDPI journal article supplement (https://www.mdpi.com/2410-3888/8/11/563)
Supplement: s1 [file s1]

Count of vessel trips

## Motorised LL

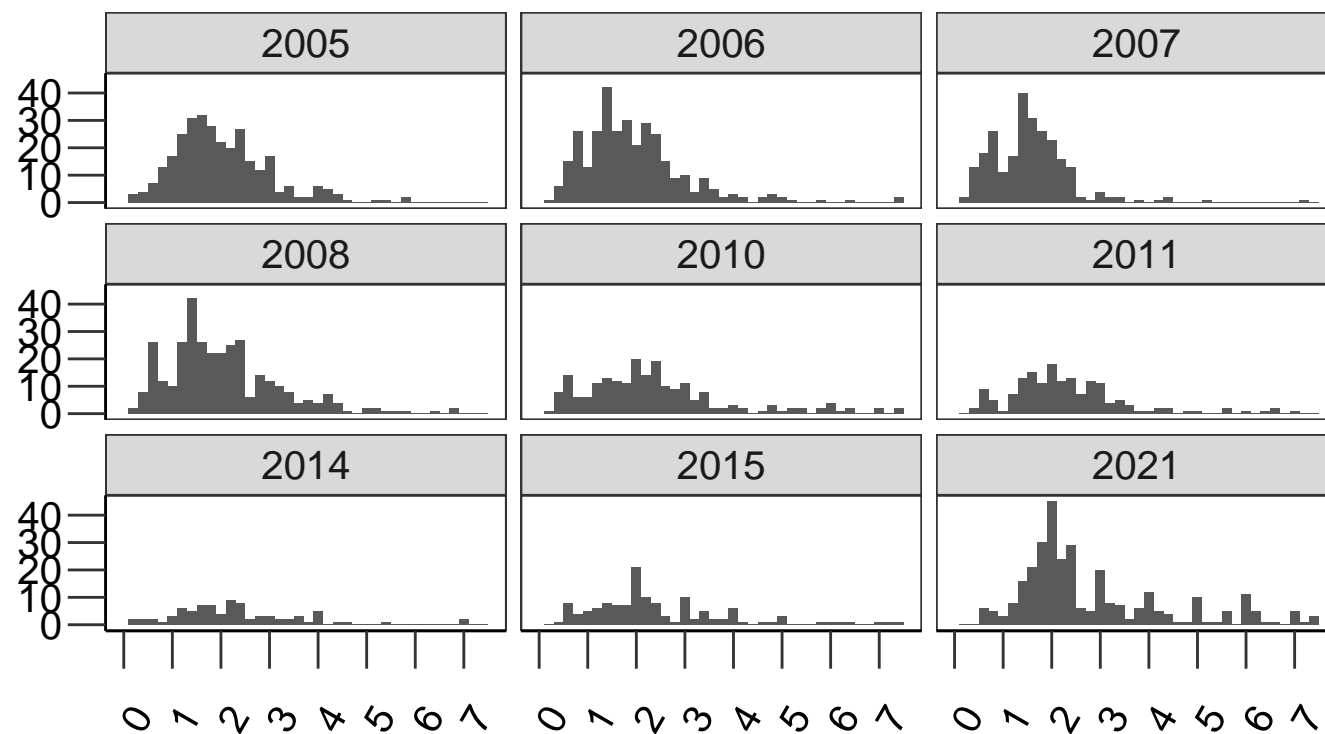

## Motorised GN

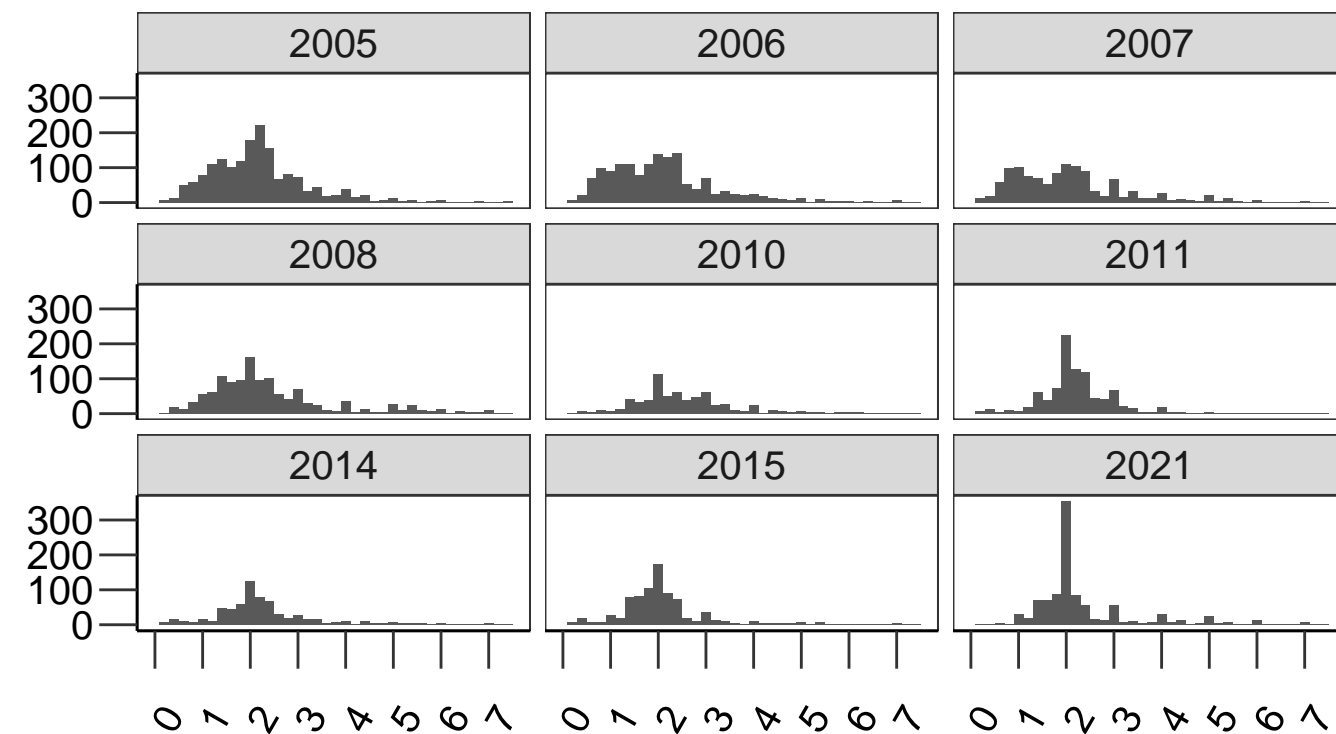

## Paddled LL

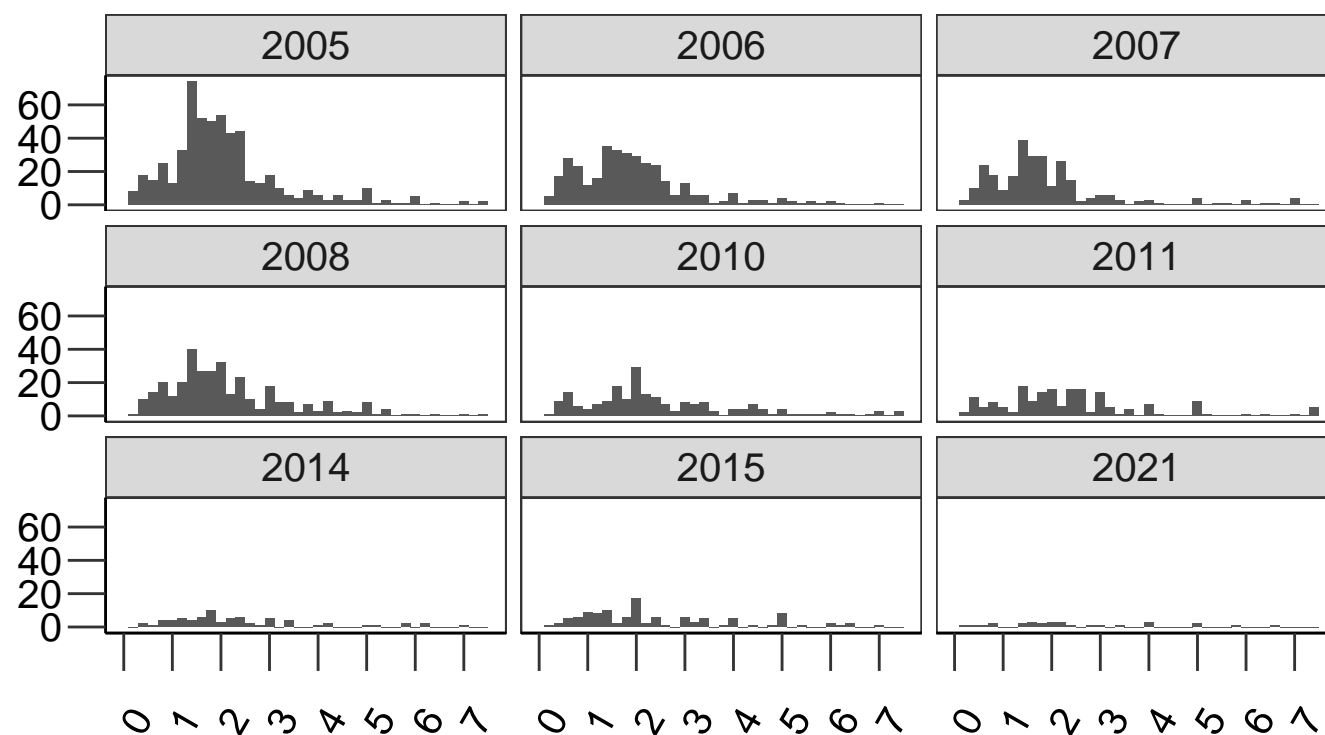

## Paddled GN

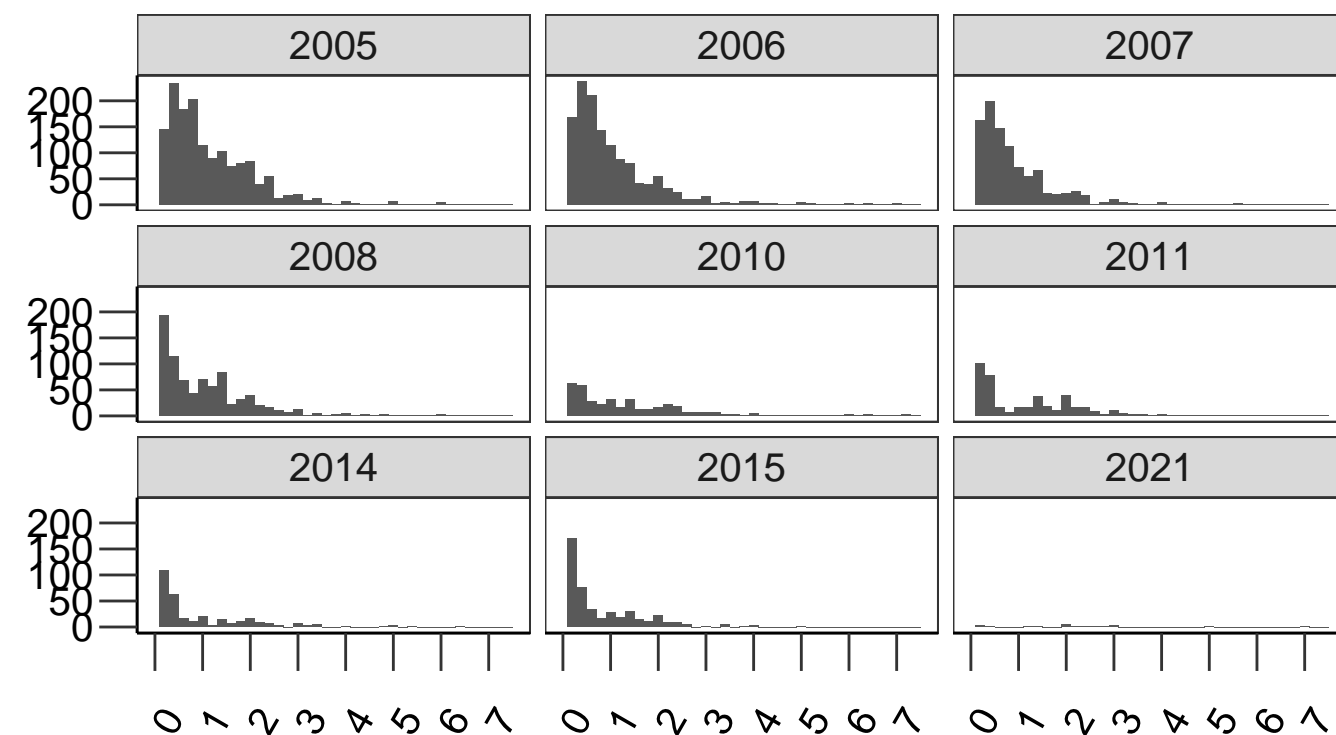

Estimated average weight (kg)
