# Supplementary material
Source: MDPI journal article supplement (https://www.mdpi.com/2410-3888/8/11/563)

# Longline

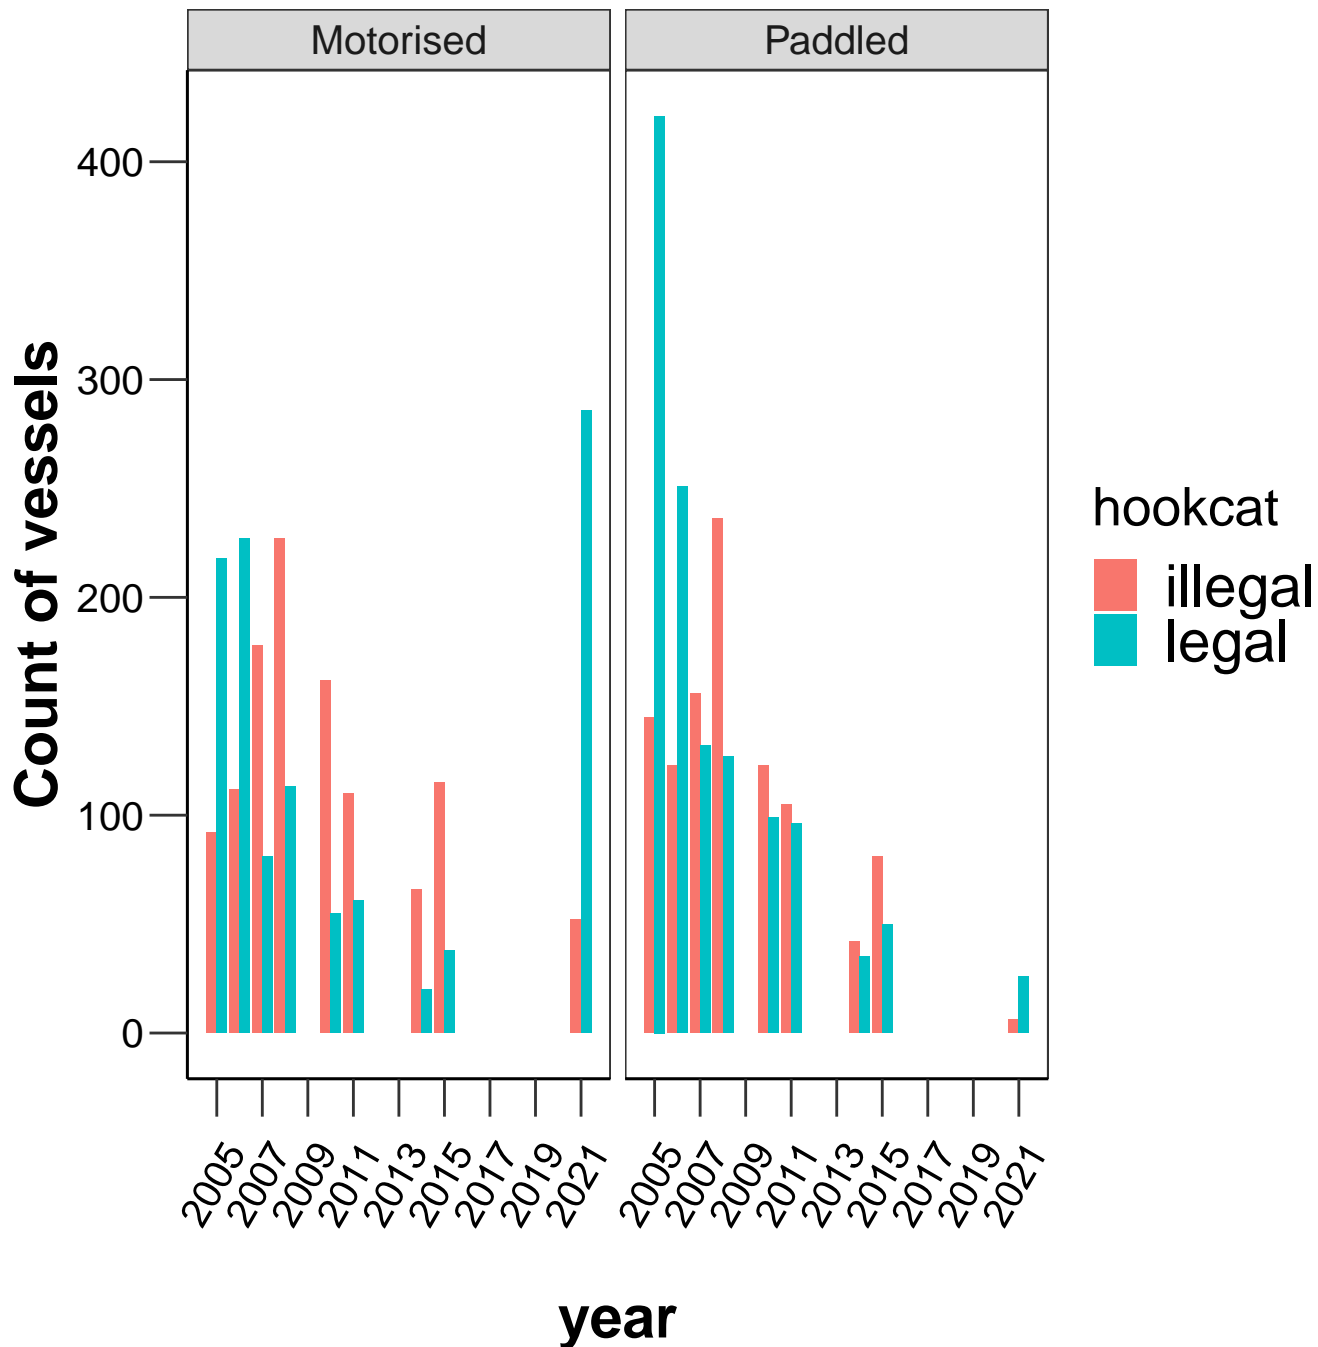

Supplement: s1 [file s1]
